# Supplementary material for: Whole Chromosome Instability induces senescence and promotes SASP
Source: PubMed Central journal article supplement (PMC5059742; doi:10.1038/srep35218), 2016-10-12

## **Whole Chromosome Instability induces senescence and promotes SASP**

Grasiella Angelina Andriani, Vinnycius Pereira Almeida, Francesca Faggioli, Maurizio Mauro, Wanxia Li Tsai, Laura Santambrogio, Alexander Maslov, Massimo Gadina, Judith Campisi, Jan Vijg and Cristina Montagna.

**Supplementary information**

**Supplementary Tables:**

**Table S1. Distribution of ploidy changes observed during replicative senescence and total number of cells analyzed for each cell line.**

|                   | <b>Total %Aneuploid</b> | <b>%4n</b> | <b>%3n</b> | <b>%1n</b> | <b>%&gt;5n</b> | <b>%2n</b> | <b>%Non-diploid</b> | <b>Cells counted</b> |
|-------------------|-------------------------|------------|------------|------------|----------------|------------|---------------------|----------------------|
| <b>HPF PD42</b>   | 4.0                     | 4.5        | 0.5        | 0.2        | 0.7            | 90.1       | 9.9                 | 554                  |
| <b>HPF PD56</b>   | 10.0                    | 7.5        | 1.1        | 0.4        | 1.4            | 79.6       | 20.4                | 279                  |
| <b>HPF PD74</b>   | 22.9                    | 26.6       | 1.5        | 0.0        | 11.1           | 37.8       | 62.2                | 458                  |
|                   |                         |            |            |            |                |            |                     |                      |
| <b>MEF PD04-1</b> | 5.1                     | 30.3       | 0.0        | 0.0        | 0.0            | 64.6       | 35.4                | 99                   |
| <b>MEF PD04-2</b> | 2.0                     | 42.6       | 0.0        | 0.0        | 1.0            | 54.5       | 45.5                | 101                  |
| <b>MEF PD10-1</b> | 19.6                    | 36.1       | 2.1        | 0.0        | 9.3            | 33.0       | 67.0                | 97                   |
| <b>MEF-PD10-2</b> | 16.1                    | 36.6       | 0.0        | 0.0        | 6.5            | 40.9       | 59.1                | 93                   |

**Table S2. Distribution of ploidy changes detected in each cell line per biological replicate (1, 2 and 3), and frequency BrdU positive cells as detected by immunofluorescence.**

|               | <b>%Aneuploid</b> | <b>%4n</b> | <b>%3n</b> | <b>%1n</b> | <b>%&gt;5n</b> | <b>%2n</b> | <b>%Non-diploid</b> | <b>% BrdU</b> |
|---------------|-------------------|------------|------------|------------|----------------|------------|---------------------|---------------|
| <b>EV1</b>    | 1.9               | 2.9        | 0.5        | 0.0        | 0.5            | 94.2       | 5.8                 | 83.1          |
| <b>EV2</b>    | 0.0               | 3.0        | 0.0        | 0.0        | 0.0            | 97.0       | 3.0                 | 82.1          |
| <b>EV3</b>    | 5.0               | 5.0        | 0.0        | 0.0        | 1.0            | 88.9       | 11.1                | 72.4          |
| <b>shB1-1</b> | 6.3               | 8.9        | 0.0        | 1.6        | 1.0            | 82.3       | 17.7                | 72.9          |
| <b>shB1-2</b> | 1.5               | 10.4       | 0.0        | 0.0        | 0.0            | 88.1       | 11.9                | 72.3          |
| <b>shB1-3</b> | 18.1              | 4.5        | 1.0        | 0.0        | 0.5            | 75.9       | 24.1                | 81.9          |
| <b>shB2-1</b> | 6.5               | 9.7        | 0.0        | 0.0        | 0.0            | 83.9       | 16.1                | 61.3          |
| <b>shB2-2</b> | 12.4              | 9.4        | 0.5        | 0.0        | 3.0            | 74.8       | 25.2                | 64.4          |
| <b>shB2-3</b> | 3.6               | 14.3       | 0.5        | 0.0        | 2.0            | 79.6       | 20.4                | 68.4          |
| <b>shS1-1</b> | 18.6              | 11.3       | 2.0        | 0.5        | 1.5            | 66.2       | 33.8                | 51.0          |
| <b>shS1-2</b> | 17.9              | 18.4       | 2.0        | 0.0        | 3.5            | 58.2       | 41.8                | 52.5          |
| <b>shS1-3</b> | 4.0               | 17.4       | 0.5        | 0.0        | 1.0            | 77.1       | 22.9                | 49.8          |
| <b>shS2-1</b> | 22.3              | 11.4       | 2.6        | 0.5        | 3.1            | 60.1       | 39.9                | 37.3          |
| <b>shS2-1</b> | 20.9              | 18.4       | 2.5        | 0.0        | 2.5            | 55.7       | 44.3                | 38.5          |
| <b>shS2-3</b> | 10.0              | 23.0       | 1.0        | 0.0        | 1.0            | 65.0       | 35.0                | 39.0          |
| <b>SEN1</b>   | 9.2               | 19.5       | 0.5        | 0.0        | 1.5            | 69.2       | 30.8                | 19.8          |
| <b>SEN2</b>   | 10.1              | 23.1       | 0.5        | 0.5        | 1.9            | 63.9       | 36.1                | 21.6          |



**Table S4. Values of the SASP factors secreted 2 fold or more by shS2 cells relative to EV detected in the preliminary SASP screen. For each sample, the average and standard deviation (s.d.) concentration values for each component (pg/ml) are shown. The results are listed in order of fold difference expression, indicating the *p* values for each SASP component (generated from a t-test analysis between EV and shS2 values – n=2). Official gene symbol is followed by previous gene symbol and spelled full names within brackets.**

| Gene                                                                     | EV Average (pg/ml) | EV (s.d.) | shS2 Average (pg/ml) | shS2 (s.d.) | Fold difference | Significant? (alpha<0.05) | <i>p</i> value (two-tailed) |
|--------------------------------------------------------------------------|--------------------|-----------|----------------------|-------------|-----------------|---------------------------|-----------------------------|
| <i>CXCL8/IL-8</i> (C-X-C motif chemokine ligand 8)                       | 7.0                | 9.8       | 1917.9               | 1170.9      | 273.3           | No                        | 0.147                       |
| <i>CXCL10/IP-10</i> (C-X-C motif chemokine ligand 10)                    | 0                  | 0         | 96.0                 | 55.6        | 96.0            | No                        | 0.135                       |
| <i>CCL2/MCP-1</i> (C-C motif chemokine ligand 2)                         | 4.9                | 6.9       | 156.6                | 26.6        | 32.2            | <u>Yes</u>                | <u>0.016</u>                |
| <i>IL1B/IL-1<math>\beta</math></i> (Interleukin 1 beta)                  | 0.1                | 0         | 0.9                  | 0.2         | 16.7            | <u>Yes</u>                | <u>0.030</u>                |
| <i>TNF/TNF-<math>\alpha</math></i> (Tumor necrosis factor)               | 0.6                | 0.1       | 8.8                  | 0.8         | 14.8            | <u>Yes</u>                | <u>0.005</u>                |
| <i>CXCL1/GRO<math>\alpha</math></i> (C-X-C motif chemokine ligand 1)     | 10.1               | 14.3      | 121.9                | 172.5       | 12.1            | No                        | 0.457                       |
| <i>CSF2/GM-CSF</i> (Colony stimulating factor 2)                         | 2.1                | 3.0       | 20.2                 | 4.4         | 9.6             | <u>Yes</u>                | <u>0.041</u>                |
| <i>IL6/IL-6</i> (Interleukin 6)                                          | 2.5                | 3.1       | 23.1                 | 10.3        | 9.4             | No                        | 0.114                       |
| <i>CCL27/CTACK</i> (C-C motif chemokine ligand 27)                       | 0.9                | 1.3       | 7.1                  | 4.6         | 7.8             | No                        | 0.208                       |
| <i>CXCL12/SDF-1<math>\alpha</math></i> (C-X-C motif chemokine ligand 12) | 12.2               | 17.3      | 68.2                 | 11.3        | 5.6             | No                        | 0.062                       |
| <i>IL15/IL-15</i> (Interleukin 15)                                       | 0.3                | 0         | 1.1                  | 0.8         | 4.0             | No                        | 0.293                       |
| <i>IL12B</i> (Interleukin 12B)                                           | 4.1                | 5.5       | 13.7                 | 2.4         | 3.3             | No                        | 0.152                       |
| <i>MIF</i> (Macrophage migration inhibitory factor)                      | 89.2               | 11.8      | 292.1                | 228.1       | 3.3             | No                        | 0.336                       |

|                                                                 |       |      |       |       |     |    |       |
|-----------------------------------------------------------------|-------|------|-------|-------|-----|----|-------|
| <i>NGF/b-NGF</i> (Nerve growth factor)                          | 1.4   | 0.2  | 4.5   | 1.6   | 3.2 | No | 0.113 |
| <i>CLEC11A/SCGF-b</i> (C-type lectin domain family 11 member A) | 135.8 | 91.1 | 422.0 | 147.6 | 3.1 | No | 0.145 |
| <i>IL10/IL-10</i> (Interleukin 10)                              | 1.1   | 1.6  | 3.0   | 4.2   | 2.6 | No | 0.611 |
| <i>KITLG/SCF</i> (KIT ligand)                                   | 1.1   | 0.9  | 2.5   | 0.1   | 2.2 | No | 0.160 |

**Table S5. Validation of W-CIN-induced SASP components. The secreted factors that were tested are listed in alphabetical order and indicated as the concentration (pg/ml) measured in the conditioned medium of EV, Bub1-, SMC1A-depleted and SEN cells, respectively. For each sample, the average and standard deviation (s.d.) concentration values for each component are shown. The fold differences relative to control EV cells, as well as the *p* value generated from One-way ANOVA analysis comparing all samples to EV are also shown.**

|                                          |         | Gene                    | EV Average (pg/ml) | EV (s.d.)   | shB1 Average (pg/ml) | shB1 (s.d.) | Fold difference relative to EV | Significant? (alpha<0.05) | <i>p</i> value (two-tailed) |
|------------------------------------------|---------|-------------------------|--------------------|-------------|----------------------|-------------|--------------------------------|---------------------------|-----------------------------|
|                                          |         | <b>BUB1-depleted</b>    |                    | <b>shB1</b> |                      |             |                                |                           |                             |
| <i>CCL2 (MCP-1)</i>                      | 4.402   |                         |                    | 1.471       | 37.002               | 17.269      | 8.4                            | No                        | 0.4819                      |
| <i>CCL27 (CTACK)</i>                     | 0.467   |                         |                    | 0.121       | 1.632                | 0.527       | 3.5                            | No                        | 0.3736                      |
| <i>CLEC11A (SCGF-b)</i>                  | 376.129 |                         |                    | 45.857      | 835.251              | 162.340     | 2.2                            | No                        | 0.5198                      |
| <i>CSF2 (GM-CSF)</i>                     | 0.631   |                         |                    | 0.212       | 0.901                | 0.061       | 1.4                            | No                        | 0.763                       |
| <i>CXCL1 (GRO<math>\alpha</math>)</i>    | 1.215   |                         |                    | 0.645       | 0.531                | 0.132       | 0.4                            | No                        | 0.8221                      |
| <i>CXCL10 (IP-10)</i>                    | 0.049   |                         |                    | 0.012       | 0.231                | 0.291       | 4.8                            | No                        | 0.8554                      |
| <i>CXCL12 (SDF-1<math>\alpha</math>)</i> | 4.014   |                         |                    | 0.960       | 6.037                | 3.008       | 1.5                            | No                        | 0.5837                      |
| <i>CXCL8 (IL8)</i>                       | 0.744   |                         |                    | 0.236       | 5.215                | 3.821       | 7.0                            | No                        | 0.9427                      |
| <i>IL10</i>                              | 0.074   |                         |                    | 0.080       | 0.173                | 0.074       | 2.3                            | No                        | 0.841                       |
| <i>IL1B</i>                              | 0.001   |                         |                    | 0.000       | 0.002                | 0.001       | 1.4                            | No                        | 0.994                       |
| <i>IL6</i>                               | 2.734   |                         |                    | 1.551       | 23.598               | 16.623      | 8.6                            | No                        | 0.1891                      |
| <i>MIF</i>                               | 3.055   |                         |                    | 0.854       | 9.938                | 3.504       | 3.3                            | No                        | 0.4388                      |
| <i>TNF</i>                               | 0.053   | 0.021                   | 0.161              | 0.046       | 3.1                  | No          | 0.2379                         |                           |                             |
| <b>shB2</b>                              |         | Gene                    | EV Average (pg/ml) | EV (s.d.)   | shB2 Average (pg/ml) | shB2 (s.d.) | Fold difference relative to EV | Significant? (alpha<0.05) | <i>p</i> value (two-tailed) |
|                                          |         | <i>CCL2 (MCP-1)</i>     | 4.402              | 1.471       | 35.866               | 15.600      | 8.1                            | No                        | 0.497                       |
|                                          |         | <i>CCL27 (CTACK)</i>    | 0.467              | 0.121       | 2.565                | 1.973       | 5.5                            | No                        | 0.2086                      |
|                                          |         | <i>CLEC11A (SCGF-b)</i> | 376.129            | 45.857      | 1817.459             | 570.667     | 4.8                            | No                        | 0.0786                      |
|                                          |         | <i>CSF2 (GM-CSF)</i>    | 0.631              | 0.212       | 0.937                | 0.921       | 1.5                            | No                        | 0.6293                      |

|  |                                          |       |       |        |       |     |            |               |
|--|------------------------------------------|-------|-------|--------|-------|-----|------------|---------------|
|  | <i>CXCL1 (GRO<math>\alpha</math>)</i>    | 1.215 | 0.645 | 0.920  | 0.786 | 0.8 | No         | 0.9155        |
|  | <i>CXCL10 (IP-10)</i>                    | 0.049 | 0.012 | 0.193  | 0.235 | 4.0 | No         | 0.8821        |
|  | <i>CXCL12 (SDF-1<math>\alpha</math>)</i> | 4.014 | 0.960 | 4.672  | 4.409 | 1.2 | No         | 0.8523        |
|  | <i>CXCL8 (IL8)</i>                       | 0.744 | 0.236 | 3.320  | 2.300 | 4.5 | No         | 0.9761        |
|  | <i>IL10</i>                              | 0.074 | 0.080 | 0.531  | 0.720 | 7.2 | No         | 0.4666        |
|  | <i>IL1B</i>                              | 0.001 | 0.000 | 0.001  | 0.001 | 1.1 | No         | 0.9989        |
|  | <i>IL6</i>                               | 2.734 | 1.551 | 9.155  | 5.749 | 3.3 | No         | 0.693         |
|  | <i>MIF</i>                               | 3.055 | 0.854 | 11.115 | 1.574 | 3.6 | No         | 0.4058        |
|  | <i>TNF</i>                               | 0.053 | 0.021 | 0.319  | 0.149 | 6.0 | <u>Yes</u> | <u>0.0201</u> |



|                                          |         | Gene                                     | EV Average (pg/ml) | EV (s.d.) | shS1 Average (pg/ml) | shS1 (s.d.)         | Fold difference relative to EV | Significant? (alpha<0.05) | p value (two-tailed) |        |      |
|------------------------------------------|---------|------------------------------------------|--------------------|-----------|----------------------|---------------------|--------------------------------|---------------------------|----------------------|--------|------|
|                                          |         | SMC1A -depleted                          |                    | shS1      |                      | <i>CCL2 (MCP-1)</i> | 4.402                          | 1.471                     | 86.744               | 54.639 | 19.7 |
| <i>CCL27 (CTACK)</i>                     | 0.467   |                                          |                    | 0.121     | 2850.731             | 1827.076            | 6108.9                         | No                        | 0.308                |        |      |
| <i>CLEC11A (SCGF-b)</i>                  | 376.129 |                                          |                    | 45.857    | 2.143                | 3.027               | 0.0                            | <u>Yes</u>                | 0.0132               |        |      |
| <i>CSF2 (GM-CSF)</i>                     | 0.631   |                                          |                    | 0.212     | 0.038                | 0.050               | 0.1                            | No                        | 0.5099               |        |      |
| <i>CXCL1 (GRO<math>\alpha</math>)</i>    | 1.215   |                                          |                    | 0.645     | 1.235                | 1.755               | 1.0                            | No                        | 0.9944               |        |      |
| <i>CXCL10 (IP-10)</i>                    | 0.049   |                                          |                    | 0.012     | 3.903                | 4.450               | 80.2                           | <u>Yes</u>                | 0.0079               |        |      |
| <i>CXCL12 (SDF-1<math>\alpha</math>)</i> | 4.014   |                                          |                    | 0.960     | 9.450                | 12.376              | 2.4                            | No                        | 0.2625               |        |      |
| <i>CXCL8 (IL8)</i>                       | 0.744   |                                          |                    | 0.236     | 24.331               | 30.952              | 32.7                           | No                        | 0.7324               |        |      |
| <i>IL10</i>                              | 0.074   |                                          |                    | 0.080     | 0.219                | 0.374               | 3.0                            | No                        | 0.7939               |        |      |
| <i>IL1B</i>                              | 0.001   |                                          |                    | 0.000     | 0.002                | 0.002               | 1.5                            | No                        | 0.993                |        |      |
| <i>IL6</i>                               | 2.734   |                                          |                    | 1.551     | 18.527               | 15.946              | 6.8                            | No                        | 0.3743               |        |      |
| <i>MIF</i>                               | 3.055   |                                          |                    | 0.854     | 23.326               | 7.588               | 7.6                            | <u>Yes</u>                | 0.0499               |        |      |
| <i>TNF</i>                               | 0.053   |                                          |                    | 0.021     | 0.089                | 0.015               | 1.7                            | No                        | 0.7494               |        |      |
| shS2                                     |         | Gene                                     | EV Average (pg/ml) | EV (s.d.) | shS2 Average (pg/ml) | shS2 (s.d.)         | Fold difference relative to EV | Significant? (alpha<0.05) | p value (two-tailed) |        |      |
|                                          |         | <i>CCL2 (MCP-1)</i>                      | 4.402              | 1.471     | 245.152              | 166.934             | 55.7                           | <u>Yes</u>                | 0.0002               |        |      |
|                                          |         | <i>CCL27 (CTACK)</i>                     | 0.467              | 0.121     | 5.090                | 4.568               | 10.9                           | <u>Yes</u>                | 0.0142               |        |      |
|                                          |         | <i>CLEC11A (SCGF-b)</i>                  | 376.129            | 45.857    | 3092.486             | 1422.508            | 8.2                            | <u>Yes</u>                | 0.0042               |        |      |
|                                          |         | <i>CSF2 (GM-CSF)</i>                     | 0.631              | 0.212     | 3.202                | 2.416               | 5.1                            | <u>Yes</u>                | 0.0044               |        |      |
|                                          |         | <i>CXCL1 (GRO<math>\alpha</math>)</i>    | 1.215              | 0.645     | 17.205               | 12.003              | 14.2                           | <u>Yes</u>                | 0.0001               |        |      |
|                                          |         | <i>CXCL10 (IP-10)</i>                    | 0.049              | 0.012     | 6.090                | 1.767               | 125.1                          | <u>Yes</u>                | 0.0003               |        |      |
|                                          |         | <i>CXCL12 (SDF-1<math>\alpha</math>)</i> | 4.014              | 0.960     | 54.133               | 10.738              | 13.5                           | <u>Yes</u>                | < 0.0001             |        |      |
|                                          |         | <i>CXCL8 (IL8)</i>                       | 0.744              | 0.236     | 310.829              | 273.745             | 418.0                          | <u>Yes</u>                | 0.0008               |        |      |

|  |  |             |       |       |        |        |       |            |          |
|--|--|-------------|-------|-------|--------|--------|-------|------------|----------|
|  |  | <i>IL10</i> | 0.074 | 0.080 | 1.470  | 1.881  | 19.9  | <u>Yes</u> | 0.0432   |
|  |  | <i>IL1B</i> | 0.001 | 0.000 | 0.699  | 0.593  | 523.0 | <u>Yes</u> | < 0.0001 |
|  |  | <i>IL6</i>  | 2.734 | 1.551 | 63.525 | 51.904 | 23.2  | <u>Yes</u> | 0.0033   |
|  |  | <i>MIF</i>  | 3.055 | 0.854 | 60.870 | 31.504 | 19.9  | <u>Yes</u> | < 0.0001 |
|  |  | <i>TNF</i>  | 0.053 | 0.021 | 0.484  | 0.272  | 9.2   | <u>Yes</u> | 0.001    |

|            | Gene                                  | EV Average (pg/ml) | EV (s.d.) | SEN Average (pg/ml) | SEN (s.d.) | Fold difference relative to EV | Significant? (alpha<0.05) | p value (two-tailed) |
|------------|---------------------------------------|--------------------|-----------|---------------------|------------|--------------------------------|---------------------------|----------------------|
| <b>SEN</b> | <i>CCL2 (MCP-1)</i>                   | 4.402              | 1.471     | 277.703             | 192.630    | 63.090                         | <u>Yes</u>                | 0.0009               |
|            | <i>CCL27 (CTACK)</i>                  | 0.467              | 0.121     | 2.315               | 1.160      | 4.961                          | No                        | 0.1349               |
|            | <i>CLEC11A (SCGF-b)</i>               | 376.129            | 45.857    | 1443.024            | 300.854    | 3.837                          | No                        | 0.0815               |
|            | <i>CSF2 (GM-CSF)</i>                  | 0.631              | 0.212     | 6.406               | 1.129      | 10.148                         | <u>Yes</u>                | < 0.0001             |
|            | <i>CXCL1 (GRO<math>\alpha</math>)</i> | 1.215              | 0.645     | 125.527             | 90.238     | 103.336                        | <u>Yes</u>                | 0.0001               |
|            | <i>CXCL10 (IP-10)</i>                 | 0.049              | 0.012     | 26.977              | 15.297     | 554.233                        | <u>Yes</u>                | < 0.0001             |
|            | <i>CXCL12 (SDF-1a)</i>                | 4.014              | 0.960     | 64.369              | 38.901     | 16.035                         | <u>Yes</u>                | 0.0002               |
|            | <i>CXCL8 (IL8)</i>                    | 0.744              | 0.236     | 386.169             | 164.381    | 519.378                        | <u>Yes</u>                | < 0.0001             |
|            | <i>IL10</i>                           | 0.074              | 0.080     | 0.482               | 0.242      | 6.519                          | No                        | 0.3463               |
|            | <i>IL1B</i>                           | 0.001              | 0.000     | 5.190               | 2.873      | 3882.364                       | <u>Yes</u>                | < 0.0001             |
|            | <i>IL6</i>                            | 2.734              | 1.551     | 1643.687            | 746.793    | 601.275                        | <u>Yes</u>                | < 0.0001             |
|            | <i>MIF</i>                            | 3.055              | 0.854     | 24.642              | 8.639      | 8.065                          | <u>Yes</u>                | 0.0111               |
|            | <i>TNF</i>                            | 0.053              | 0.021     | 0.743               | 0.448      | 14.106                         | <u>Yes</u>                | 0.0008               |

**Table S6. Correlation analysis between the percentages of not 2n cells and secretion levels of individual SASP components (CLEC11A, CCL2, CCL27 and MIF) including the Pearson correlation coefficient (*r*) and *p* values that were found statistically significant. The average percentage of not 2n cells in each sample (X axis) is plotted against the average levels of each factor analyzed (Y axis).**

| Sample                                            | X axis                 |                       | Y axis                  |                |                      |             |                       |              |                     |            |
|---------------------------------------------------|------------------------|-----------------------|-------------------------|----------------|----------------------|-------------|-----------------------|--------------|---------------------|------------|
|                                                   | % Average Not 2n cells | % Not 2n cells (s.d.) | Average CLEC11A (pg/ml) | CLEC11A (s.d.) | Average CCL2 (pg/ml) | CCL2 (s.d.) | Average CCL27 (pg/ml) | CCL27 (s.d.) | Average MIF (pg/ml) | MIF (s.d.) |
| EV                                                | 6.6                    | 4.1                   | 376.1                   | 45.9           | 4.4                  | 1.5         | 0.5                   | 0.1          | 3.1                 | 0.9        |
| shB1                                              | 17.9                   | 6.1                   | 835.3                   | 162.3          | 37.0                 | 17.3        | 1.6                   | 0.5          | 9.9                 | 3.5        |
| shB2                                              | 20.6                   | 4.6                   | 1817.5                  | 570.7          | 35.9                 | 15.6        | 2.6                   | 2.0          | 11.1                | 1.6        |
| shS1                                              | 32.8                   | 9.5                   | 2850.7                  | 1827.1         | 86.7                 | 54.6        | 2.1                   | 3.0          | 23.3                | 7.6        |
| shS2                                              | 39.7                   | 4.6                   | 3092.5                  | 1422.5         | 245.2                | 166.9       | 5.1                   | 4.6          | 60.9                | 31.5       |
| SEN                                               | 33.4                   | 3.7                   | 1443.0                  | 300.9          | 277.7                | 192.6       | 2.3                   | 1.2          | 24.6                | 8.6        |
| <b>Pearson correlation coefficient (<i>r</i>)</b> |                        |                       | <b>0.8619</b>           |                | <b>0.8318</b>        |             | <b>0.8221</b>         |              | <b>0.8534</b>       |            |
| <b><i>p</i> value (two-tailed)</b>                |                        |                       | <b>0.0273</b>           |                | <b>0.0401</b>        |             | <b>0.0447</b>         |              | <b>0.0306</b>       |            |
| <b>Significant? alpha&lt;0.05</b>                 |                        |                       | <b>Yes</b>              |                | <b>Yes</b>           |             | <b>Yes</b>            |              | <b>Yes</b>          |            |

**Table S7. shRNA sequences of the targets used in this study.**

| <b>Target gene</b> | <b>shRNA ID</b> | <b>Sense sequence 5' - 3'</b> |
|--------------------|-----------------|-------------------------------|
| BUB1               | shB1            | CCTGGGTCAGAGTATAGATAT         |
| BUB2               | shB2            | TACAACAGTGACCTCCATCAA         |
| BUB3               | shB3            | CGAGGTTAATCCAGCACGTAT         |
| BUB4               | shB4            | AGAAATACAATCAACGGAGAA         |
|                    |                 |                               |
| SMC1A              | shS1            | GCCGGGACTGTATTCAGTATA         |
| SMC1A              | shS2            | CCAACATTGATGAGATCTATA         |
| SMC1A              | shS3            | CCAACAAGGAAATGACCCATT         |
| SMC1A              | shS4            | CGACAGATTATCGGACCATTT         |

**Table S8. Sequences of the human primers used for qRT-PCR.**

| <b>Gene</b>    | <b>Fwd primer 5'-3'</b> | <b>Rev primer 5'-3'</b> | <b>TaqMan probe</b>  |
|----------------|-------------------------|-------------------------|----------------------|
| <b>BUB1</b>    | GGTGGTGCCTTCAAGGGATGG   | GCAGCAGGCTGGCTCAGACG    | SYBR green detection |
| <b>SMC1A</b>   | AGGCCCTCATTGAGATTGAC    | GCAATACGCTGAAGCACACT    | SYBR green detection |
| <b>BUB3</b>    | CGCATGCCTGGAGTGGAGGA    | GGGGCATCATGGGTCCCAAC    | SYBR green detection |
| <b>BUB1B</b>   | CGTGGCAATACAGCTTCACT    | AGGCTTTCTGGTGCTTAGGA    | SYBR green detection |
| <b>SOD1</b>    | TCAGGAGACCATTGCATCAT    | GAATGTTTATTGGGCGATCC    | SYBR green detection |
| <b>GPX1</b>    | TTGACATCGAGCCTGACATC    | ACTGGGATCAACAGGACCAG    | SYBR green detection |
| <b>GAPDH</b>   | TCAAGAAGGTGGTGAAGCAG    | CGCTGTTGAAGTCAGAGGAG    | CCTCAAGGGCATCCTGGGCT |
| <b>CLEC11A</b> | GGCTAGTGACCTGCACACAG    | GCACCCAAAGTTCCAGATGT    | CTCGGCAGTTCCAGAGGCC  |

## Supplementary figures

**Fig S1. Primary mammalian cells *in vitro* show accumulation of ploidy changes as they approach SEN. (a, b, d and e)** Representative images of four-color interphase-FISH in HPFs (a and b) and MEFs (d and e) showing diploid (a and d), tetraploid (b) and aneuploid nuclei (e). (c and f) Bright field representative images of senescent HPF (c) and MEFs (f) stained for SA- $\beta$ gal.

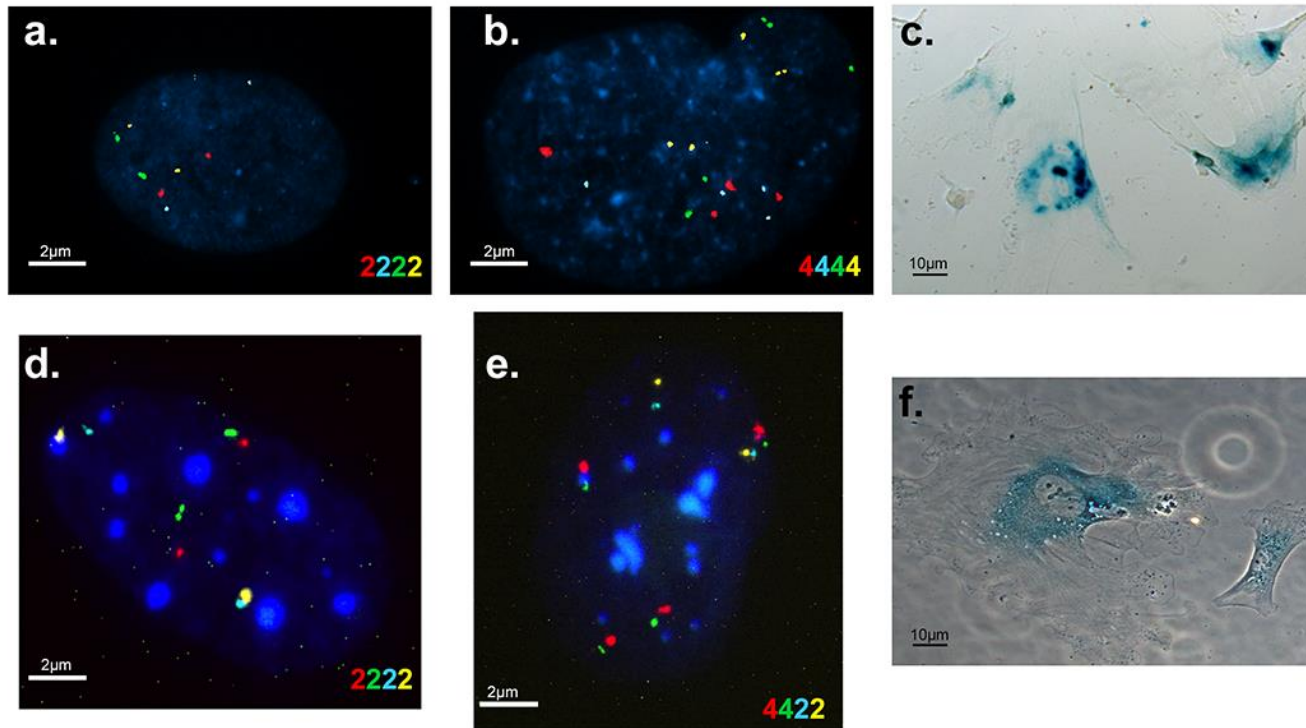

**Fig S2. Depletion of *BUB1* or *SMC1A* results in W-CIN, reduction of DNA replication and negligible apoptosis in human fibroblasts.** (a-c) Representative interphase FISH images showing the hybridization signals that were detected. The numbers of signals for each chromosome are indicated with the correspondent color of fluorophore used for staining. (a) Diploid nuclei (2222). (b) Nuclei containing 6 copies of each chromosome (6666), and morphology suggestive of abnormal mitosis. (c) Tetraploid nuclei (4444). Representative images of BrdU positive (d), and negative (e) nuclei containing 2 hybridization signals for chromosome 9 in the Cy5 channel. (f) Representative image of nuclei with fragmented appearance, suggestive of apoptotic bodies.

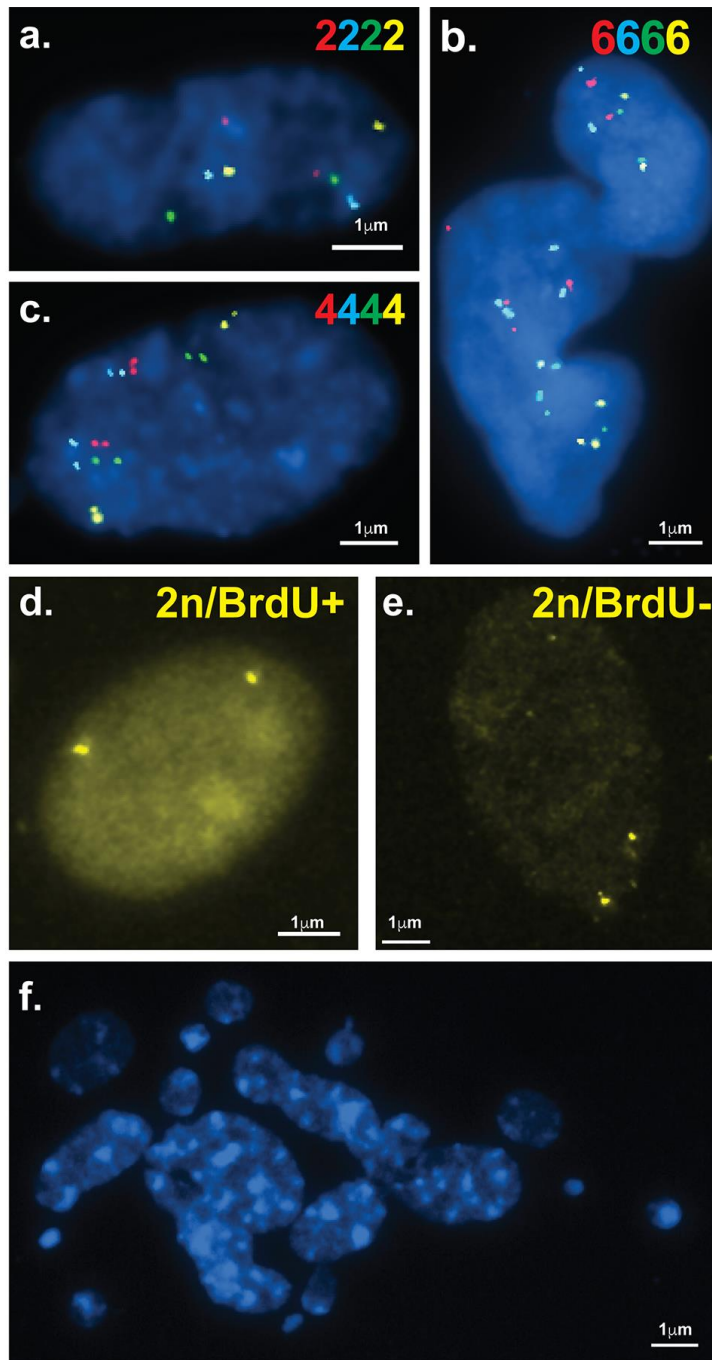



**Fig S3. Down-regulation of BUB1 and SMC1A shifts cells towards a senescent-like phenotype.** Representative FACS diagrams depicting the senescent-like population (i.e. high size and/or high AF) and respective percentage of these cells in each culture. Forward scatter channel (FSC-A) in X-axis depicts cell size and autofluorescence channel (FITC-A) in Y-axis depicts lipofuscin content. EV=empty vector; SEN= replicative senescence; shB2= BUB1-depleted; shS2= SMC1-depleted.

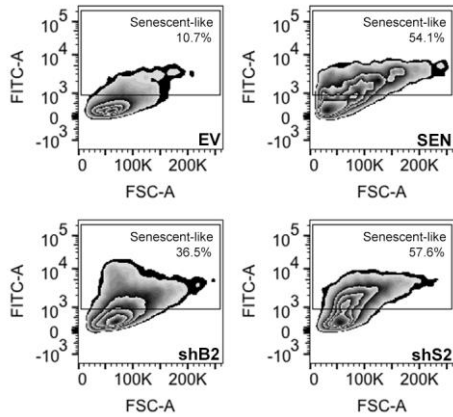

**Fig S4. W-CIN-induced senescence is associated with generation of DNA DSBs.** (a) Quantification of number of 53BP1 foci per nucleus in each culture. (b) Correlation plot between the percentages of not-diploid and 53BP1 foci containing cells. (\*) Indicates significant differences ( $p < 0.05$ ) from EV cells by One-way ANOVA. Data are mean  $\pm$  SD ( $n=3$ ).

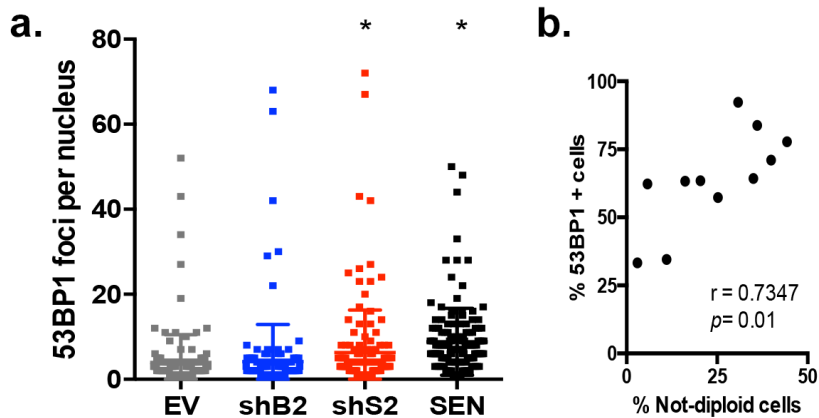

**Fig S5. SASP analysis of W-CIN cells.** Plots depicting the amount of each of the SASP factors tested (pg/ml) in the CM of all cell lines. (\*) Indicates significant differences ( $p < 0.05$ ) from EV cells by One-way ANOVA. Data are mean  $\pm$  SD (n=6, n=5 for SEN).

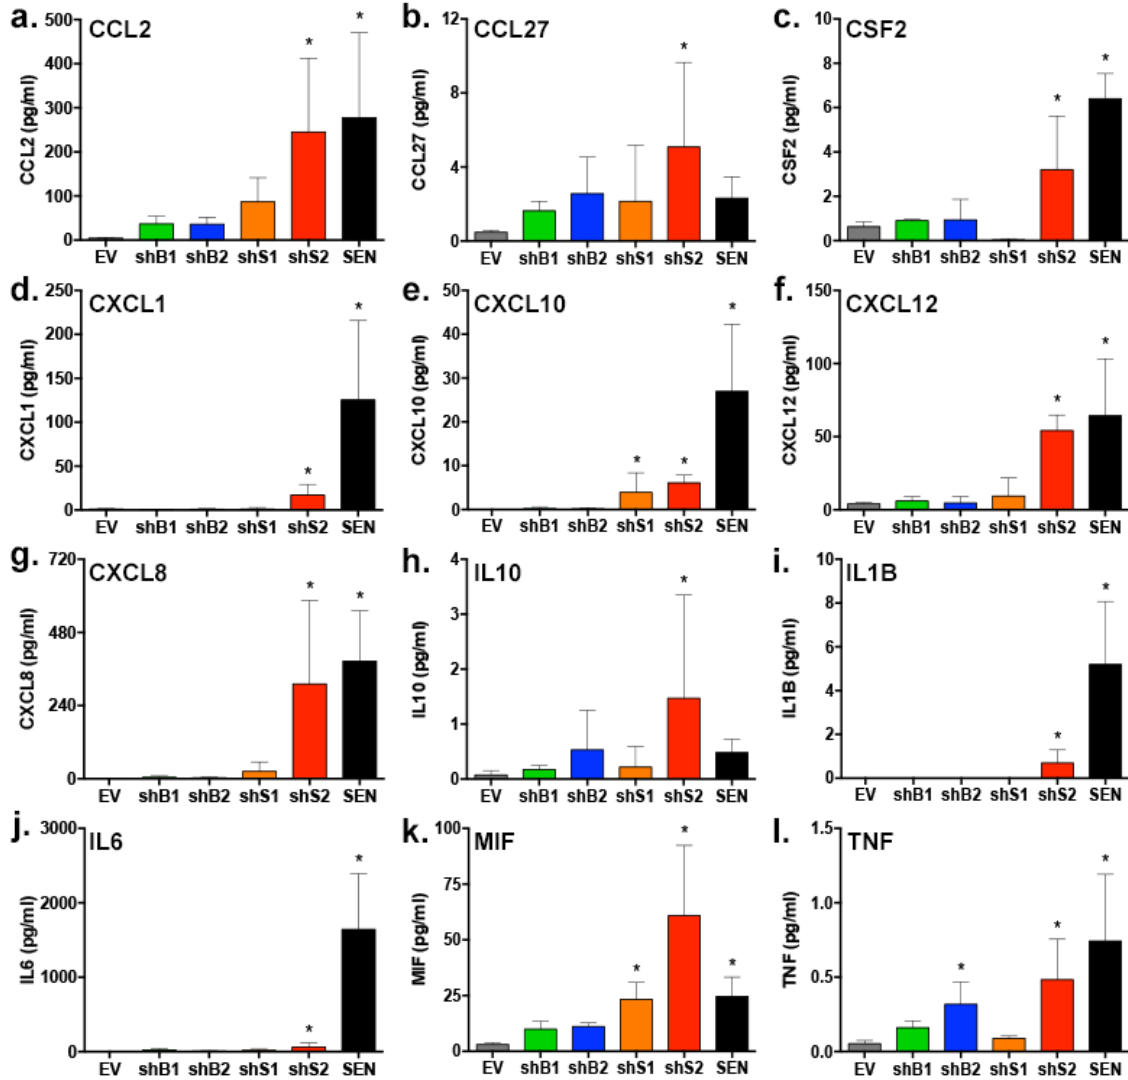

**Fig S6. PQ and Bleo-induced senescence do not up-regulate CLEC11A.** Bright field representative images of (a) PQ- and (b) Bleo-induced HPF senescent fibroblasts stained for SA- $\beta$ gal.

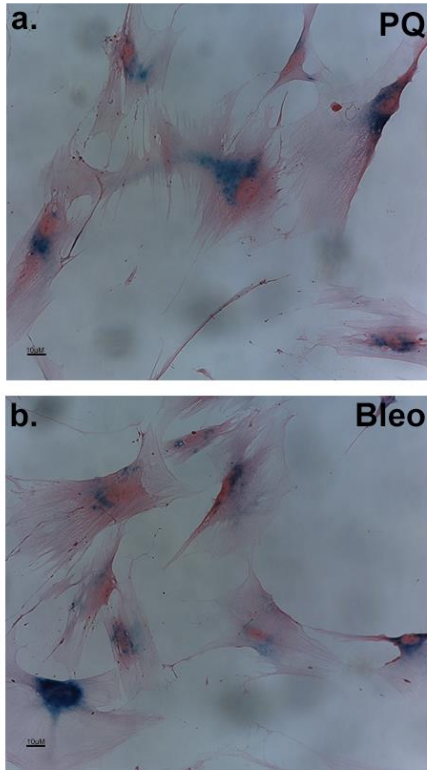

**Fig S7. Efficiency of lentiviral transduction.** Plot representing the percentage of cells infected by lentivirus at the three multiplicity of infection tested (MOI)(n=2).

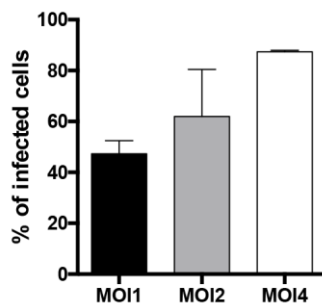

Supplement: srep35218-s1.pdf [file srep35218-s1.pdf]
